1 **Disparate effects of metformin on *Mycobacterium tuberculosis* infection in**  
2 **diabetic and non-diabetic mice**

3 Harindra D. Sathkumara<sup>1</sup>, Karyna Hansen<sup>1</sup>, Socorro Miranda-Hernandez<sup>1</sup>, Brenda  
4 Govan<sup>1, 2</sup>, Catherine M. Rush<sup>1, 2</sup>, Lars Henning<sup>2</sup>, Natkunam Ketheesan<sup>3</sup> and  
5 Andreas Kupz<sup>1,\*</sup>

6 <sup>1</sup>Centre for Molecular Therapeutics, Australian Institute of Tropical Health and  
7 Medicine, James Cook University, Cairns & Townsville, Queensland 4870 & 4811,  
8 Australia

9 <sup>2</sup>College of Public Health, Medical and Veterinary Sciences, James Cook University,  
10 Townsville, Queensland 4811, Australia

11 <sup>3</sup>Science and Technology, University of New England, Armidale, NSW 2351,  
12 Australia

13 \* Corresponding Author

14 Address correspondence to

15 Dr Andreas Kupz

16 Phone: +61742322048

17 Fax: +6174784655

18 E-mail: [andreas.kupz@jcu.edu.au](mailto:andreas.kupz@jcu.edu.au)

19

20 Running title: Effect of metformin on tuberculosis

21

22 Abstract word count: 75

23 Main text word count: 1542

24

25

26

27 **Abstract**

28 Comorbid type 2 diabetes poses a great challenge to the global control of  
29 tuberculosis. Here we assessed the efficacy of metformin (MET); an anti-diabetic  
30 drug, in mice infected with a very-low dose of *Mycobacterium tuberculosis*. In  
31 contrast to diabetic mice, infected non-diabetic mice that received the same  
32 therapeutic concentration of MET presented with significantly higher disease burden.  
33 This warrants further studies to investigate the disparate efficacy of MET  
34 against tuberculosis in diabetic and non-diabetic individuals.

35

36 Keywords: tuberculosis, diabetes, metformin, host-directed therapy

37

38

39

## 40 **Introduction**

41 Tuberculosis (TB) remains one of the deadliest infectious diseases with an estimated  
42 annual mortality of 1.5 million and nearly 1.7 billion latently-infected people  
43 worldwide.<sup>1</sup> Whilst infections with drug-susceptible *Mycobacterium tuberculosis*  
44 (*Mtb*), the causative agent of TB, can be treated with long-term antibiotic therapy,  
45 emergence of drug-resistant strains and increasing incidence of comorbid conditions,  
46 such as diabetes mellitus (DM), pose a great challenge to TB eradication.<sup>2</sup> It is  
47 estimated that 463 million people are currently living with diabetes<sup>3</sup> and have a  
48 threefold increased risk of developing active TB<sup>4</sup> and demonstrated a strong link with  
49 multi-drug-resistant (MDR) TB.<sup>5</sup>

50

51 Poor treatment adherence, clinical complications and continuous exposure to  
52 conventional anti-TB monotherapy often lead to drug tolerance and resistance.<sup>6</sup> In  
53 addition to the evaluation of new and existing repurposed anti-TB drugs, there has  
54 also been an increased interest in non-antimicrobial host-directed therapies (HDTs)  
55 which often target host immune responses with the potential to shorten and improve  
56 treatment duration and therapeutic efficacy against all forms of TB.<sup>7</sup>

57

58 Metformin (MET; 1,1-dimethylbiguanide) is a widely prescribed AMP-activated  
59 protein kinase (AMPK)-activating anti-diabetic drug found to be associated with  
60 reduced TB risk among diabetic patients.<sup>8, 9</sup> MET was previously shown to inhibit  
61 intracellular growth of *Mtb* and improve the efficacy of first-line anti-TB drug;  
62 isoniazid (INH) in young non-diabetic C57BL/6 mice.<sup>9</sup> However, in a recent  
63 experiment, MET failed to enhance the potency of current anti-TB treatment regimen  
64 in young BALB/c mice<sup>10</sup>, implying the need to resolve the discrepant findings

65 between experiments and more importantly to investigate the true impact of MET on  
66 TB in the context of diabetes.

67

68 In this study, we sought to simultaneously evaluate the protective efficacy of MET  
69 alone and in combination with INH against TB using a robust model of murine T2D  
70 and age-matched non-diabetic control mice.<sup>11</sup>

71

## 72 **Materials and methods**

### 73 *Ethics*

74 This study was conducted in accordance with the National Health and Medical  
75 Research Council (NHMRC) animal care guidelines with all procedures approved by  
76 the animal ethics committee (A2400) of James Cook University (JCU), Australia.

77

### 78 *Diet-induced murine T2D*

79 C57BL/6 male mice housed under specific-pathogen free (SPF) conditions were  
80 randomly divided into two groups for dietary interventions. One group was given *ad*  
81 *libitum* access to an energy dense diet (EDD; 23% fat, 19% protein, 50.5% dextrose  
82 and 7.5% fibre), while the second group received an isometric quantity of standard  
83 rodent diet (SD). Thirty weeks following diet intervention, mice were assessed for  
84 body weight, fasting blood glucose levels and glucose tolerance.<sup>11</sup> Area under the  
85 curve (AUC) calculated from glucose tolerance test (GTT) was used to confirm the  
86 status of diabetes.<sup>11</sup>

87

### 88 *Bacteria*

89 *Mtb* H37Rv were cultured in 10% ADC enriched Middlebrook 7H9 broth (BD  
90 Biosciences) supplemented with 0.2% glycerol and 0.05% Tween 80. Mid-  
91 logarithmic cultures were harvested, washed in sterile PBS and stored in 15%  
92 glycerol/PBS at -80°C.

93

### 94 *Aerosol infection*

95 Mice were infected with a very-low aerosol dose (10-20 CFUs) of *Mtb* H37Rv using a  
96 Glas-Col inhalation exposure system in a biosafety level 3 (BSL3) laboratory. The

97 infectious dose was determined by culturing homogenized lung tissues of 4-5 mice  
98 on 10% OADC enriched 7H11 agar plates 1-day post infection (p.i.).

99

#### 100 *Drugs*

101 Seven days post aerosol *Mtb* challenge, treatments were initiated by administering  
102 MET and INH (both from Sigma) alone or in combination (MET+INH) to mice in  
103 drinking water delivering ~500 mg/kg and ~10 mg/kg, respectively (1.25 mg/ml MET  
104 in drinking water delivers a dose of approximately 250 mg/kg to mice<sup>12</sup>). Water  
105 bottles containing drugs were changed every 4-6 days.

106

#### 107 *Sample collection*

108 At designated time points, mice were sacrificed and blood was collected in Z-gel  
109 tubes (Sarstedt). Coagulated blood was spun and serum samples were filtered using  
110 0.2 µm SpinX columns (Sigma) for storage at -20°C. Lungs were aseptically removed  
111 for CFU enumeration and histology analysis.

112

#### 113 *CFU enumeration*

114 Right lung lobes were homogenized in sampling bags containing 1 ml of sterile PBS/  
115 0.05% Tween 80. Serial dilutions of tissue homogenates were plated on 10% OADC  
116 enriched 7H11 agar plates supplemented with 10 µg/ul cycloheximide and 20 µg/ml  
117 ampicillin. Plates were incubated for 3-4 weeks at 37°C. Total CFUs per each organ  
118 was calculated based on dilution factor and organ size.

119

120

121

122 *Lung histology*

123 Left lung lobes were fixed overnight with 10% neutral buffered formalin and  
124 transferred into 70% ethanol the next day. Processed lung lobes were embedded in  
125 paraffin, cut (4  $\mu$ m sections) and stained with Hematoxylin and Eosin (H&E) and  
126 Ziehl-Neelsen (ZN). ImageJ software (NIH) was used to measure the total surface  
127 area followed by the areas of dense cell infiltration. Proportions of infiltration were  
128 calculated accordingly.

129

130 *Serum cytokine/chemokine analysis*

131 Serum samples were prepared for Bio-Plex Pro Mouse Cytokine 23-Plex assay  
132 (BioRad) following manufacturer's specifications. Measurements were taken using  
133 MagPix (Luminex) instrument. Log<sub>2</sub> concentration of each analyte is visualized in a  
134 heat map.

135

136 *Study inclusion*

137 Mice which showed both CFUs on 7H11 agar plates and *Mtb* bacilli by ZN stain were  
138 included. Due to the absence of viable CFUs on agar plates 5 mice were excluded  
139 from analysis despite confirmed presence of *Mtb* using ZN staining and increased  
140 lung inflammation at 45 days p.i. (**Figure S1-2**).

141

142 *Data Analysis*

143 Statistical analysis was performed using GraphPad Prism version 8. Two or multiple  
144 group analysis was carried out using Student's *t*-test and one-way analysis of  
145 variance (ANOVA), followed by Dunnett's multiple comparison test, respectively.  
146  $P < 0.05$  was considered significant.

147 **Results**

148 *Murine model of T2D*

149 Following 30 weeks of diet intervention (**Figure 1a**), mice fed with EDD presented  
150 with a significantly increased body weight (**Figure 1b**), elevated fasting blood  
151 glucose levels (**Figure 1c**) and impaired glucose tolerance as reflected by AUC  
152 (**Figure 1d**); hall mark features of human T2D.<sup>11</sup> Confirmed T2D and non-diabetic  
153 control mice were subjected to downstream experimental procedures.

154

155 *Divergent effects of metformin*

156 To investigate whether metformin could restrict the growth of *Mtb* and enhance the  
157 efficacy of the first-line anti-TB drug INH, we infected non-diabetic control and T2D  
158 mice with a very-low aerosol dose of *Mtb* H37Rv which closely mimics the human  
159 TB. CFUs recovered from lung tissue 7 days p.i. revealed that both control and T2D  
160 mice carried a similar bacterial burden prior to treatment (**Figure 2a**). At 45 days p.i.,  
161 10 mg/kg INH sterilized *Mtb* infection in almost all animals (**Figure 2b**) thus,  
162 combination therapy with 500 mg/kg MET did not further enhance the efficacy of INH  
163 in our experimental settings (**Figure 2b**). Both INH and MET+INH treatments were  
164 also accompanied by significantly lower lung immunopathology (**Figure 2c** and **S1**).  
165 Interestingly, MET-treated T2D mice had a significantly lower overall bacterial  
166 burden (~1.5-log reduction compared to untreated T2D; **Figure 2b**). Strikingly, in  
167 contrast to a previous report,<sup>9</sup> non-diabetic control mice treated with MET  
168 demonstrated a substantially increased lung *Mtb* burden (**Figure 2b**) and unchanged  
169 pro-inflammatory IL-12p40 levels (**Figure 2d**) reflecting an ongoing inflammation.  
170 This disparate efficacy of MET in non-diabetic and T2D mice resulted in a ~2-log  
171 difference in lung *Mtb* burden. Overall, systemic cytokine/ chemokine levels were



172 comparable between control and T2D mice (**Figure S3a**) and all treatments seem to  
173 have downregulated a majority of analytes (**Figure S3b**).

174

## 175 **Discussion**

176 Cumulative evidence suggests that MET prescription is associated with a  
177 significantly lower incidence of active TB among TB/DM comorbid patients.<sup>13</sup>

178 Reduced mortality, fewer pulmonary cavities and rapid culture conversion are  
179 evidence of improved health outcome. In addition, Singhal and colleagues reported

180 that MET treatment was also associated with reduced LTBI prevalence and  
181 enhanced *Mtb*-specific T cell responses as determined by T-SPOT assay.<sup>9</sup> However,

182 no significant association between LTBI and TB/DM patients taking MET was found  
183 in a more recent study.<sup>14</sup> Collectively, these retrospective studies indicate that MET

184 has the propensity to improve the overall treatment outcome when used with existing  
185 anti-TB regimens in TB/DM comorbid patients. Conformably, therapeutic

186 concentration of MET significantly improved the disease outcome in our T2D mice.  
187 However, MET did not enhance the sterilizing effect of INH. These discrepant

188 findings could be due to differences in analysis time points (35 vs 45 days p.i.)  
189 and/or reduced dose of INH (5 vs 10 mg/kg) used previously.<sup>9</sup> Strikingly, augmented

190 lung bacillary loads and lung immunopathology among non-diabetic mice that  
191 received the same therapeutic MET dose indicate diminished anti-TB immunity in

192 these mice. *Ex vivo* stimulation and *in vivo* administration of MET significantly  
193 diminished the production of *Mtb* lysate-induced pro-inflammatory cytokines and

194 downregulated the expression of type 1 interferon pathway, respectively, in healthy  
195 human peripheral blood mononuclear cells (PBMCs).<sup>15</sup>

196

197 The potential role of MET as an adjunctive therapy for TB is exciting. However,  
198 current evidences for MET-induced anti-TB protection have come mostly from  
199 retrospectively evaluated studies involving TB/DM comorbid patients. A number of  
200 studies have provided evidence for MET-induced reduction in pro-inflammatory  
201 threshold via possible inhibition of mammalian target of rapamycin (mTOR)<sup>16, 17</sup>  
202 and/or perturbed gut microbiota.<sup>18-20</sup> Whilst this immunomodulatory effect of MET  
203 can be favorable in certain high-risk populations such as diabetics with chronic  
204 inflammation, the excessive host anti-inflammatory responses can exert negative  
205 influence on the early control of *Mtb* and bacterial dissemination as observed in our  
206 non-diabetic mice. Further pre-clinical studies are therefore warranted to decipher  
207 the potentially disparate effects of MET in diabetic and non-diabetic hosts before it  
208 gains entry into clinical trials as an adjunctive anti-TB drug. In future, our long-term  
209 T2D mouse model will enable us to investigate the efficacy and optimum therapeutic  
210 concentration of MET against TB at various stages of the development of diabetes.

211

212

213 **Acknowledgments**

214 We thank Chris Wright, Lachlan Pomfrett and Serrin Rowarth for assistance with  
215 PC3 and animal house operations.

216

217 **Funding**

218 This work was supported by the National Health and Medical Research Council  
219 (NHMRC) through a CJ Martin Biomedical Early Career Fellowship (grant number  
220 APP1052764), a Career Development Fellowship (grant number APP1140709), a  
221 New Investigator Project Grant (grant number APP1120808) and an Australian  
222 Institute of Tropical Health and Medicine (AITHM) Capacity Building Grant (grant  
223 number 15031) to A.K & N.K. H.D.S. was supported by an AITHM scholarship.

224

225 **Author Contributions**

226 A.K. and N.K. conceived of the study. H.D.S., K.H., S.M-H., C.R. and A.K. performed  
227 experiments; H.D.S. and A.K., performed data analysis. N.K., B.G., C.R. and L.H.  
228 assisted with troubleshooting and intellectual input. H.D.S. and A.K. wrote the initial  
229 manuscript. All co-authors commented extensively on the manuscript and approved  
230 it.

231

232 **Transparency declaration**

233 None to declare.

234

235

236

237

238 **References**

239

240 1. WHO. Global Tuberculosis Report 2019.

241 <https://apps.who.int/iris/bitstream/handle/10665/329368/9789241565714->

242 [eng.pdf?ua=1](#) (19 December 2019, date last accessed).

243 2. Amberbir A. The challenge of worldwide tuberculosis control: and then came

244 diabetes. *Lancet Glob Health* 2019; **7**: e390-e1.

245 3. Federation ID. IDF Diabetes Atlas. <http://www.diabetesatlas.org/> (27th

246 December 2019, date last accessed).

247 4. Al-Rifai RH, Pearson F, Critchley JA et al. Association between diabetes

248 mellitus and active tuberculosis: A systematic review and meta-analysis. *PloS one*

249 2017; **12**: e0187967.

250 5. Tegegne BS, Mengesha MM, Teferra AA et al. Association between diabetes

251 mellitus and multi-drug-resistant tuberculosis: evidence from a systematic review and

252 meta-analysis. *Syst Rev* 2018; **7**: 161.

253 6. Gillespie SH. Evolution of drug resistance in *Mycobacterium tuberculosis*:

254 clinical and molecular perspective. *Antimicrob Agents Chemother* 2002; **46**: 267-74.

255 7. Zumla A, Chakaya J, Centis R et al. Tuberculosis treatment and

256 management--an update on treatment regimens, trials, new drugs, and adjunct

257 therapies. *Lancet Respir Med* 2015; **3**: 220-34.

258 8. Lin SY, Tu HP, Lu PL et al. Metformin is associated with a lower risk of active

259 tuberculosis in patients with type 2 diabetes. *Respirology* 2018; **23**: 1063-73.

260 9. Singhal A, Jie L, Kumar P et al. Metformin as adjunct antituberculosis therapy.

261 *Sci Transl Med* 2014; **6**: 263ra159.

- 262 10. Dutta NK, Pinn ML, Karakousis PC. Metformin Adjunctive Therapy Does Not  
263 Improve the Sterilizing Activity of the First-Line Antitubercular Regimen in Mice.  
264 *Antimicrob Agents Chemother* 2017; **61**.
- 265 11. Morris JL, Bridson TL, Alim MA et al. Development of a diet-induced murine  
266 model of diabetes featuring cardinal metabolic and pathophysiological abnormalities  
267 of type 2 diabetes. *Biol Open* 2016; **5**: 1149-62.
- 268 12. Chandel NS, Avizonis D, Reczek CR et al. Are Metformin Doses Used in  
269 Murine Cancer Models Clinically Relevant? *Cell Metab* 2016; **23**: 569-70.
- 270 13. Zhang M, He JQ. Impacts of metformin on tuberculosis incidence and clinical  
271 outcomes in patients with diabetes: a systematic review and meta-analysis. *Eur J*  
272 *Clin Pharmacol* 2019.
- 273 14. Magee MJ, Salindri AD, Kornfeld H et al. Reduced prevalence of latent  
274 tuberculosis infection in diabetes patients using metformin and statins. *The*  
275 *European respiratory journal* 2019; **53**.
- 276 15. Lachmandas E, Eckold C, Bohme J et al. Metformin Alters Human Host  
277 Responses to Mycobacterium tuberculosis in Healthy Subjects. *The Journal of*  
278 *infectious diseases* 2019; **220**: 139-50.
- 279 16. Arts RJW, Carvalho A, La Rocca C et al. Immunometabolic Pathways in BCG-  
280 Induced Trained Immunity. *Cell reports* 2016; **17**: 2562-71.
- 281 17. Lachmandas E, Beigier-Bompadre M, Cheng SC et al. Rewiring cellular  
282 metabolism via the AKT/mTOR pathway contributes to host defence against  
283 Mycobacterium tuberculosis in human and murine cells. *European journal of*  
284 *immunology* 2016; **46**: 2574-86.
- 285 18. Elbere I, Kalnina I, Silamikelis I et al. Association of metformin administration  
286 with gut microbiome dysbiosis in healthy volunteers. *PloS one* 2018; **13**: e0204317.

287 19. Ma W, Chen J, Meng Y et al. Metformin Alters Gut Microbiota of Healthy Mice:  
288 Implication for Its Potential Role in Gut Microbiota Homeostasis. *Front Microbiol*  
289 2018; **9**: 1336.

290 20. Dumas A, Corral D, Colom A et al. The Host Microbiota Contributes to Early  
291 Protection Against Lung Colonization by Mycobacterium tuberculosis. *Front Immunol*  
292 2018; **9**: 2656.

293

294

295

296

297

298

299

300

301

302

303

304

305

306

307

308

309

310

311

312

313

314

315

316 **Main Figure Legends**

317 **Figure 1: Diet induced model of murine T2D, *Mtb* infection and treatments.** (a)

318 Six to eight weeks old C57BL/6 male mice were fed with EDD and SD (control mice)  
319 for 30 weeks to induce murine T2D. Following dietary intervention mice were  
320 assessed for (b) body weight, (c) fasting blood glucose levels and (d) glucose  
321 tolerance. (d) GTT was performed by measuring glucose concentrations at 15, 30,  
322 60, and 120 mins post i.p. glucose administration (2 g/kg) and calculating AUC. (a)  
323 Diabetic and non-diabetic control mice were infected with very-low aerosol dose (10-  
324 20 CFUs) of *Mtb* H37Rv. Seven days p.i., MET (500 mg/kg), INH (10 mg/kg) and  
325 combination of MET + INH were administered in drinking water. Results are  
326 presented as individual data points (b-d) and pooled data means  $\pm$  SEM (d) from two  
327 pooled independent experiments. Statistical analysis: \* $p < 0.05$ ; \*\* $p < 0.01$ ; \*\*\* $p <$   
328  $0.001$ ; \*\*\*\* $p < 0.0001$  by Student's *t*-test. Abbreviations: p.i.; post infection, EDD;  
329 energy dense diet, SD; standard diet, i.p.; intraperitoneal, GTT; glucose tolerance  
330 test, AUC; area under the curve.

331

332 **Figure 2: Divergent effects of MET on control and T2D mice.** Seven days p.i.,

333 group of mice were sacrificed and assessed for (a) lung bacterial loads. Forty-five  
334 days following infection, treated and untreated mice from both control and T2D  
335 groups were assessed for (b) viable bacteria in lung, (c) lung inflammation and (d)  
336 serum IL-12p40 levels. Results are presented as individual data points (a-d) and  
337 representative images (25x) (c) from two pooled independent experiments (n=7-10  
338 mice per group). Statistical analysis: \* $p < 0.05$ ; \*\* $p < 0.01$ ; \*\*\* $p < 0.001$ ; \*\*\*\* $p <$   
339  $0.0001$  by Student's *t*-test (b, c) and One-way ANOVA followed by Dunnett's multiple  
340 comparison test (b-d) from 7-10 mice per group from two pooled independent

341 experiments. Abbreviations: CON; control, T2D; type 2 diabetes, CFU; colony  
342 forming units, p.i.; post infection, UNT; untreated (Solid red circles), MET; metformin  
343 (solid black squares), INH; Isoniazid (solid black up-pointing triangles), MET+INH;  
344 combined therapy (solid black down-pointing triangles).  
345



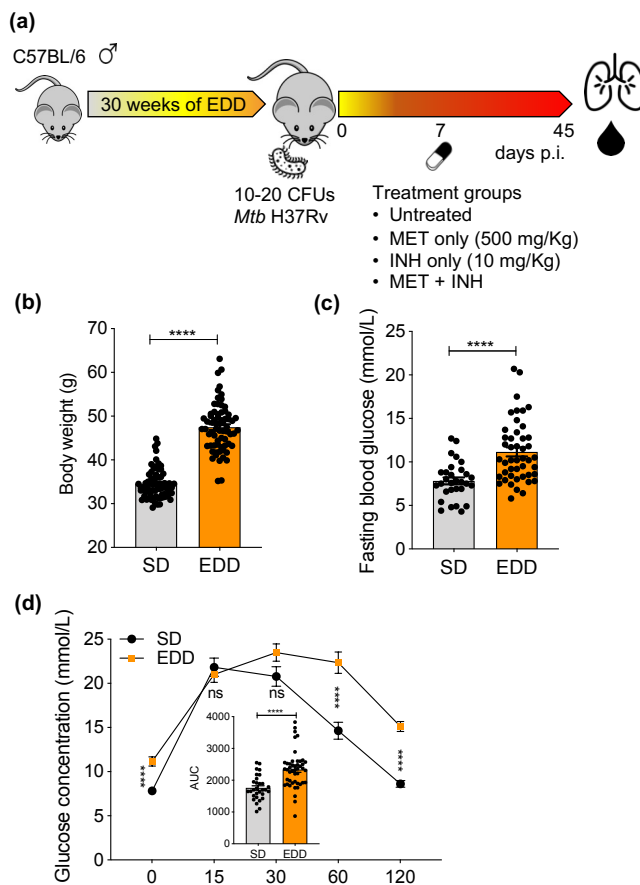

**Figure 1: Diet induced model of murine T2D, *Mtb* infection and treatments.** (a) Six to eight weeks old C57BL/6 male mice were fed with EDD and SD (control mice) for 30 weeks to induce murine T2D. Following dietary intervention mice were assessed for (b) body weight, (c) fasting blood glucose levels and (d) glucose tolerance. (d) GTT was performed by measuring glucose concentrations at 15, 30, 60, and 120 mins post i.p. glucose administration (2 g/kg) and calculating AUC. (a) Diabetic and non-diabetic control mice were infected with very-low aerosol dose (10-20 CFUs) of *Mtb* H37Rv. Seven days p.i., MET (500 mg/kg), INH (10 mg/kg) and combination of MET + INH were administered in drinking water. Results are presented as individual data points (b-d) and pooled data means  $\pm$  SEM (d) from two pooled independent experiments. Statistical analysis: \* $p < 0.05$ ; \*\* $p < 0.01$ ; \*\*\* $p < 0.001$ ; \*\*\*\* $p < 0.0001$  by Student's *t*-test. Abbreviations: p.i.; post infection, EDD; energy dense diet, SD; standard diet, i.p.; intraperitoneal, GTT; glucose tolerance test, AUC; area under the curve.

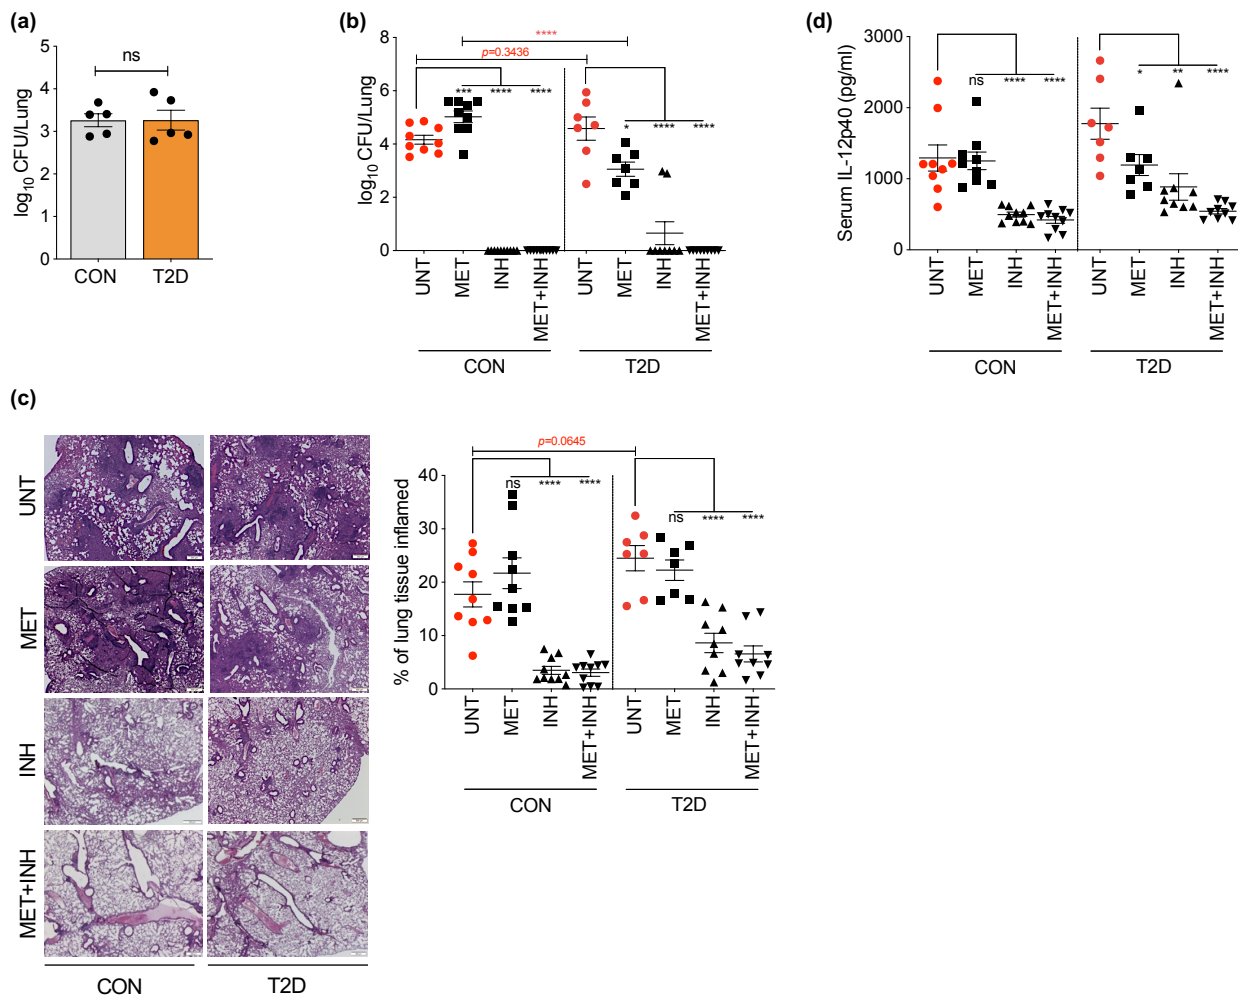

**Figure 2: Divergent effects of MET on control and T2D mice.** Seven days p.i., group of mice were sacrificed and assessed for **(a)** lung bacterial loads. Forty-five days following infection, treated and untreated mice from both control and T2D groups were assessed for **(b)** viable bacteria in lung, **(c)** lung inflammation and **(d)** serum IL-12p40 levels. Results are presented as individual data points **(a-d)** and representative images (25x) **(c)** from two pooled independent experiments (n=7-10 mice per group). Statistical analysis: \* $p < 0.05$ ; \*\* $p < 0.01$ ; \*\*\* $p < 0.001$ ; \*\*\*\* $p < 0.0001$  by Student's *t*-test **(b, c)** and One-way ANOVA followed by Dunnett's multiple comparison test **(b-d)** from 7-10 mice per group from two pooled independent experiments. Abbreviations: CON; control, T2D; type 2 diabetes, CFU; colony forming units, p.i.; post infection, UNT; untreated (Solid red circles), MET; metformin (solid black squares), INH; Isoniazid (solid black up-pointing triangles), MET+INH; combined therapy (solid black down-pointing triangles).
